# Supplementary material for: Magnesium Alloys in Orthopedics: A Systematic Review on Approaches, Coatings and Strategies to Improve Biocompatibility, Osteogenic Properties and Osteointegration Capabilities
Source: MDPI journal article supplement (doi:10.3390/ijms25010282), 2023-12-24
Supplement: s1 [file s1]

# **Magnesium Alloys in Orthopedics: A Systematic Review on Approaches, Coatings and Strategies to improve Biocompatibility, Osteogenic Properties and Osteointegration Capabilities**

*Gianluca Giavaresi<sup>a\*</sup>, Daniele Bellavia<sup>a</sup>, Angela De Luca<sup>a</sup>, Viviana Costa<sup>a</sup>, Lavinia Raimondi<sup>a</sup>, Aurora Cordaro<sup>a</sup>, Maria Sartori<sup>a</sup>, Silvio Terrando<sup>b</sup>, Angelo Toscano<sup>b</sup>, Giovanni Pignatti<sup>b</sup>, and Milena Fini<sup>c</sup>*

## **Details of the search strategies performed in December 2022.**

### 1 - Database: Medline (Pubmed)

**Search:** ((magnesium[MeSH Terms]) AND (alloy\*[MeSH Terms])) AND (osseointegration OR osteointegration[MeSH Terms]) **Filters:** **English**, from 2012 - 2022 **Sort by:** **Most Recent**

### 2 - Database: Web of Science

**Search:** TS=(magnesium AND alloy\* AND (osseointegration OR osteointegration)) AND PY=2012:2022 and **Article** (Document Types) and **English** (Languages)

### 3- Database: EMBASE

**Search:** 'magnesium'/exp AND alloy\* AND ('osseointegration'/exp OR 'osteointegration'/exp) AND (2016:py OR 2017:py OR 2018:py OR 2019:py OR 2020:py OR 2021:py OR 2022:py) AND 'article'/it AND [english]/lim

### 4-Database: Science Direct

**Search:** magnesium alloy osseointegration  
2012-2022 – research article
