# Supplementary material for: Magnesium Alloys in Orthopedics: A Systematic Review on Approaches, Coatings and Strategies to Improve Biocompatibility, Osteogenic Properties and Osteointegration Capabilities
Source: MDPI journal article supplement (doi:10.3390/ijms25010282), 2023-12-24
Supplement: s1 [file s1]

# Magnesium Alloys in Orthopedics: A Systematic Review on Approaches, Coatings and Strategies to improve Biocompatibility, Osteogenic Properties and Osteointegration Capabilities

*Gianluca Giavaresi<sup>a\*</sup>, Daniele Bellavia<sup>a</sup>, Angela De Luca<sup>a</sup>, Viviana Costa<sup>a</sup>, Lavinia Raimondi<sup>a</sup>, Aurora Cordaro<sup>a</sup>, Maria Sartori<sup>a</sup>, Silvio Terrando<sup>b</sup>, Angelo Toscano<sup>b</sup>, Giovanni Pignatti<sup>b</sup>, and Milena Fini<sup>c</sup>*

**Table 1.** List of items extracted from studies.

- Study identification information;
- Funding source;
- Author conflicts of interest;
- Type of Study (i.e., in vitro and/or in vivo study, clinical study);
- Exposure (i.e., Type of magnesium alloy/controls, Duration of exposure; etc.);
- Population (i.e., Animal species, strain, sex, origin, age; Cell line, cell type or tissue; Source of cells or tissue culture, etc.);
- Dosing methodology (i.e., Performed Tests, Treatment period, Replicates etc.);
- Controls (positive, negative, vehicle);
- Randomization procedure, allocation concealment, blinding procedure during outcome assessment(s);
- Number of replicates per group
- Main outcome;
- Statistical methods (e.g., statistical test used, significance levels).
